# Supplementary material for: Noncytotoxic artificial bacterial flagella fabricated from biocompatible ORMOCOMP and iron coating
Source: Royal Society of Chemistry journal article supplement (doi:10.1039/c3tb20840k), 2013-11-12
Supplement: c3tb20840k.pdf [file c3tb20840k.pdf]

## Noncytotoxic Artificial Bacterial Flagella Fabricated from Biocompatible ORMOCOMP and Iron Coating

Famin Qiu,<sup>a</sup> Li Zhang,<sup>b</sup> Kathrin E. Peyer,<sup>a</sup> Marco Casarosa,<sup>c</sup> Alfredo Franco-Obregón,<sup>c,d</sup> Hongsoo Choi,<sup>e</sup> and Bradley J. Nelson<sup>\*a</sup>

<sup>a</sup> Institute of Robotics and Intelligent Systems, ETH Zurich, Zurich, CH-8092, Switzerland

<sup>b</sup> Department of Mechanical and Automation Engineering, The Chinese University of Hong Kong, Hong Kong SAR, China

<sup>c</sup> Institute of Biomechanics, ETH Zurich, Zurich, CH-8093 Zurich, Switzerland

<sup>d</sup> Department of Surgery, Yong Loo Lin School of Medicine, National University of Singapore; Singapore

<sup>e</sup> Robotics Engineering Department, Daegu Gyeongbuk Institute of Science and Technology (DGIST), 711-873, Daegu, South Korea

Figures:

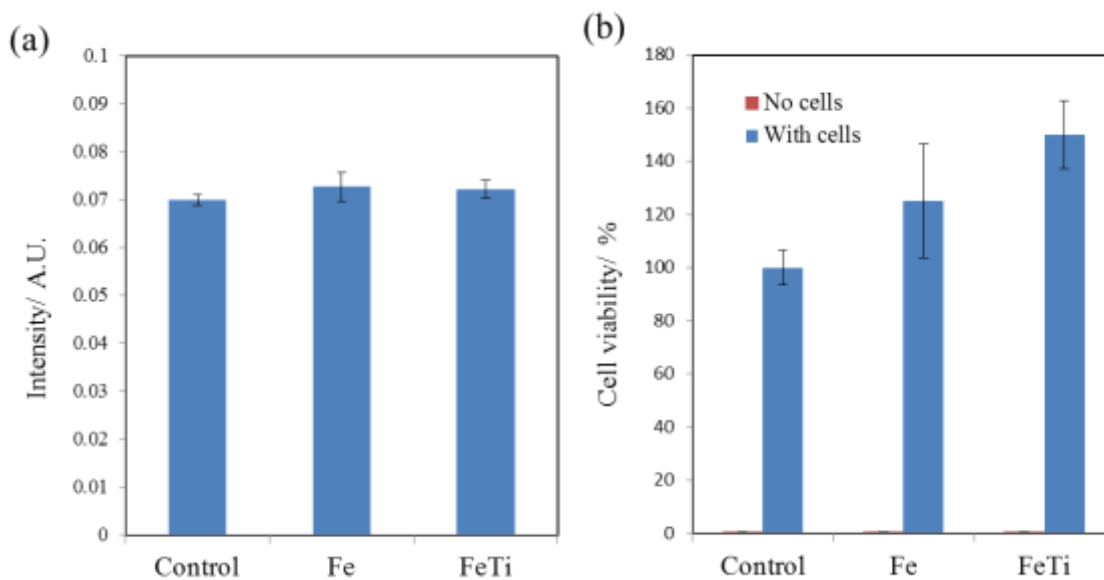

Figure S1. Comparison of MTT values with (b) and without (a,b) cells. (a) MTT assay run on Control (glass), Fe and FeTi surfaces without the presence of cells after 72 hours incubation. (b) Comparison of MTT viability determination in the presence and absence (extracted from panel (a) and compressed to fit in the same plot) of cells after 72 hours incubation. All values are normalized to the control condition in the presence of cells.

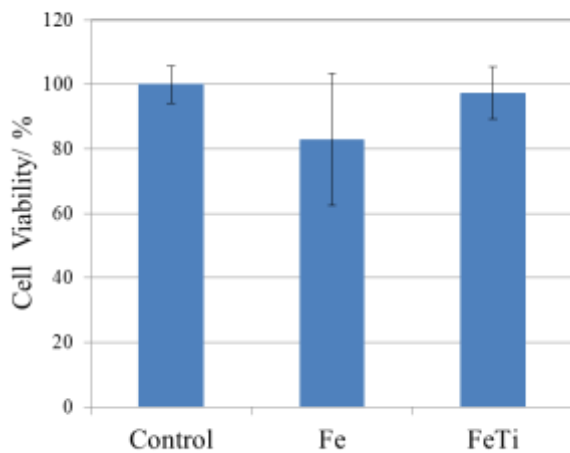

Figure S2. Trypan blue assays on Control (glass), Fe and FeTi surfaces after 72 hours incubation. No significant difference in cell viability was observed between the three substrates. The protocol of trypan blue assays was shown somewhere.<sup>1</sup>

#### Videos:

Video S1 shows DLW writing of helices in photoresist in real time.

Video S2 shows an Fe-coated ABF moving in DI-water under 9 mT at 72 Hz.

#### Reference

1. S. Crocetti, C. Beyer, G. Schade, M. Egli, J. Fröhlich and A. Franco-Obregón, *PLoS ONE*, 2013, **8**, e72944.
